# Supplementary material for: Adsorption of Contaminants of Emerging Concern (CECs) with Varying Hydrophobicity on Macro- and Microplastic Polyvinyl Chloride, Polyethylene, and Polystyrene: Kinetics and Potential Mechanisms
Source: MDPI journal article supplement (doi:10.3390/w14162581), 2022-08-21
Supplement: s1 [file s1]

Archive with 1 entries (1 files):
- water-1847761-supplementary.pdf
